# Supplementary material for: Identification of MsrA homologues for the preparation of (R)-sulfoxides at high substrate concentrations
Source: Royal Society of Chemistry journal article supplement (doi:10.1039/c9ob00384c), 2019-01-01

## Supporting Information

### Table of Contents

1. Catalytic analysis of MsrA pure recombinant enzymes.
2. HPLC and NMR spectra for compound (*R*)-**1a**
3. HPLC and NMR spectra for compound (*R*)-**1b**
4. HPLC and NMR spectra for compound (*R*)-**1c**
5. HPLC and NMR spectra for compound (*R*)-**1d**
6. HPLC and NMR spectra for compound (*R*)-**1e**
7. HPLC and NMR spectra for compound (*R*)-**1f**
8. GC and NMR spectra for compound (*R*)-**1g**
9. GC and NMR spectra for compound (*R*)-**1h**
10. HPLC and NMR spectra for compound (*R*)-**1i**
11. HPLC and NMR spectra for compound (*R*)-**1j**
12. HPLC and NMR spectra for compound (*R*)-**1k**

**1. Catalytic analysis of MsrA pure recombinant enzymes.** A) Gel electrophoresis of 5 recombinant MsrA enzymes after purification. B) Compare of conversions of 5 recombinant MsrA enzymes on substrate *rac-1a* at the enzyme concentration of 5  $\mu$ M,  $t=1$  h.

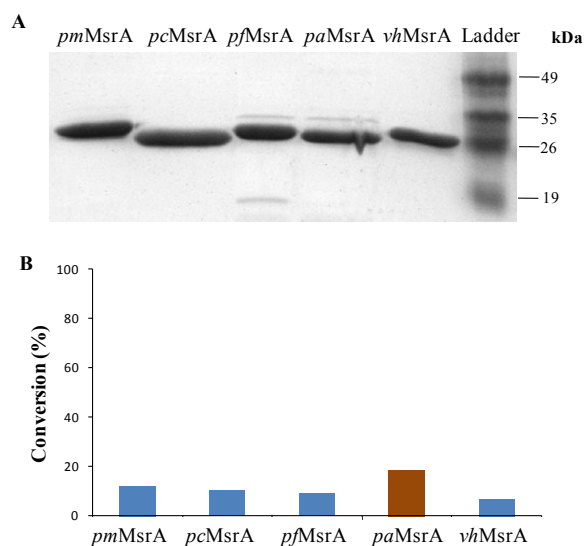

## 2. HPLC and NMR spectra for compound (*R*)-1a

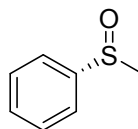

HPLC spectra for *rac*-1a

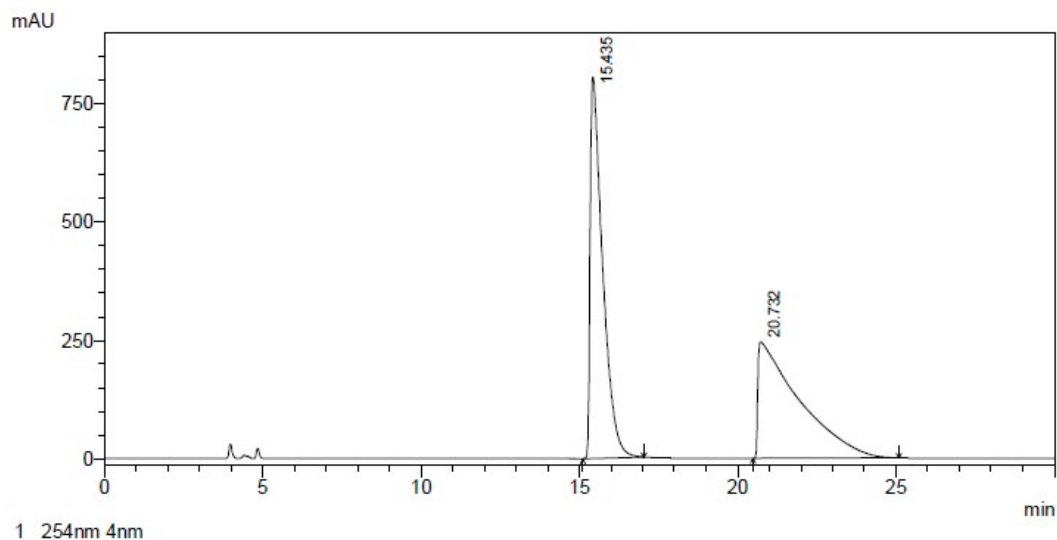

PDA

| ID# | Rt. Time | Area     | Height | Area % |
|-----|----------|----------|--------|--------|
| 1   | 15.435   | 22036816 | 805545 | 49.709 |
| 2   | 20.732   | 22295245 | 246023 | 50.291 |

HPLC spectra for (*R*)-1a

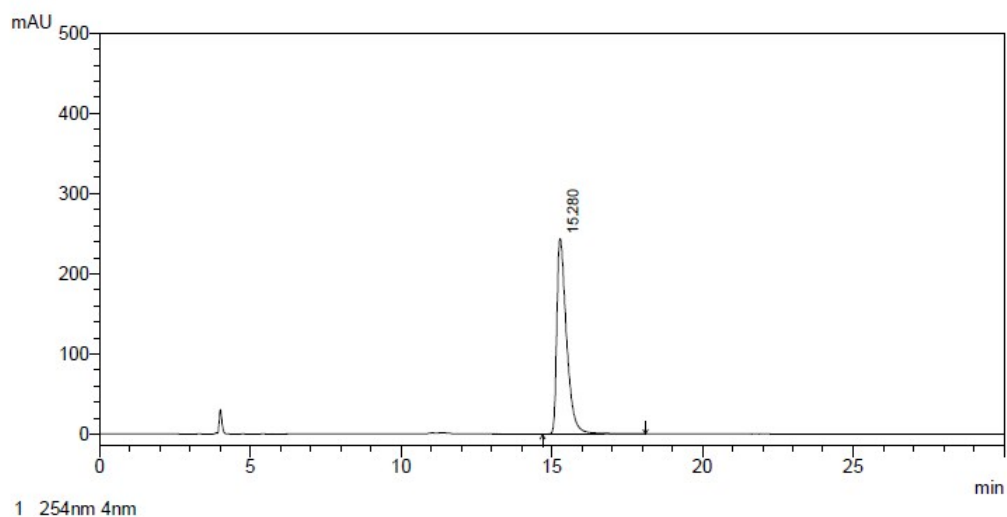

PDA

| ID# | Rt. Time | Area    | Height | Area %  |
|-----|----------|---------|--------|---------|
| 1   | 15.280   | 5482547 | 244101 | 100.000 |

# NMR spectra for (R)-1a

苯甲亚砷<sup>cyz-cy-wym</sup>l-H

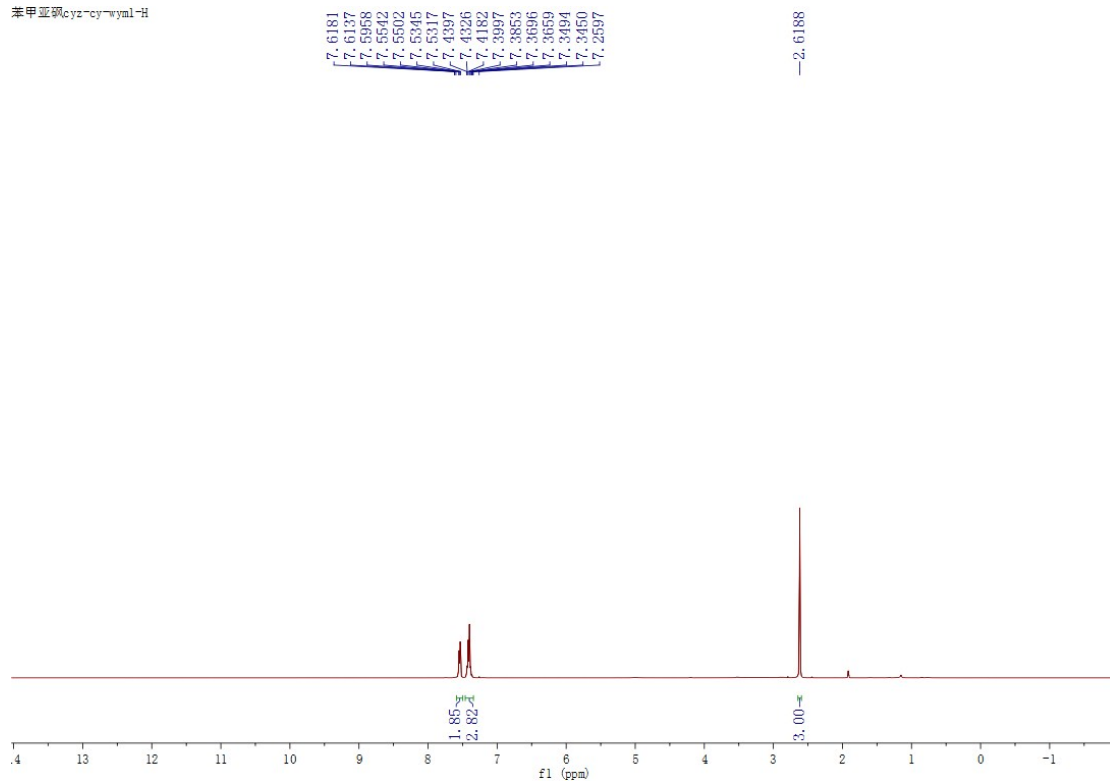

<sup>cyz-cy-wym</sup>l-C

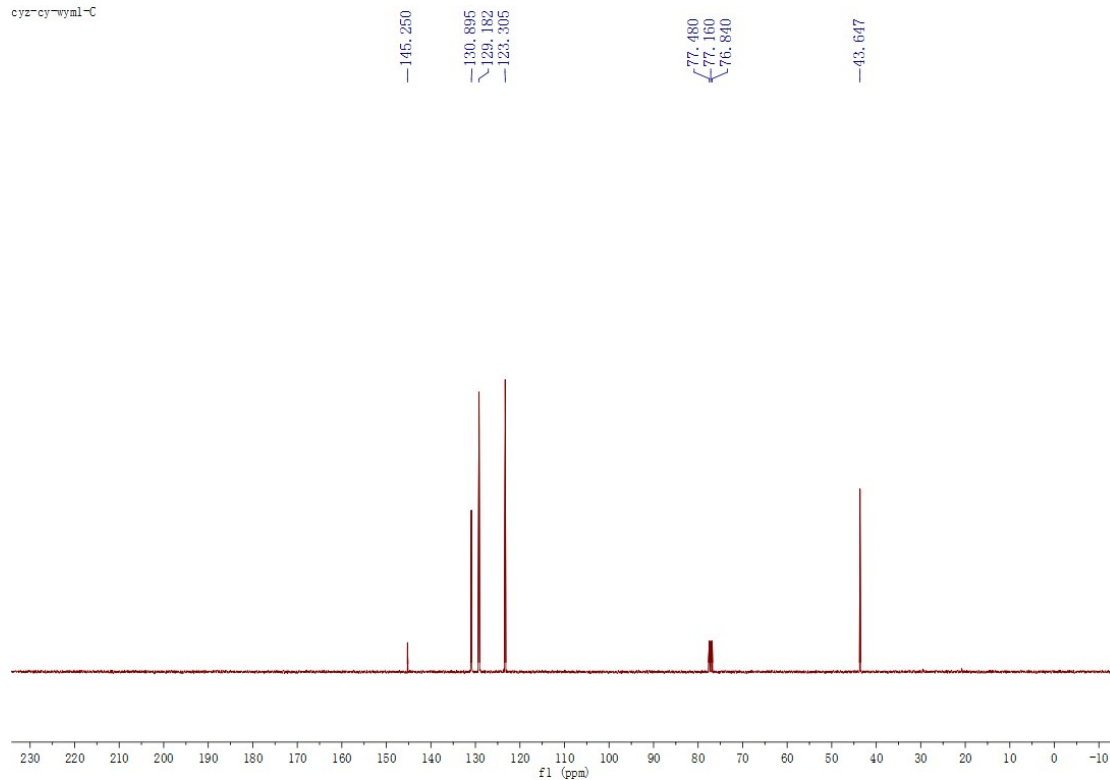

### 3. HPLC and NMR spectra data for compound (*R*)-1b

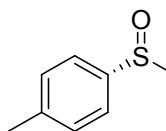

HPLC spectra for *rac*-1b

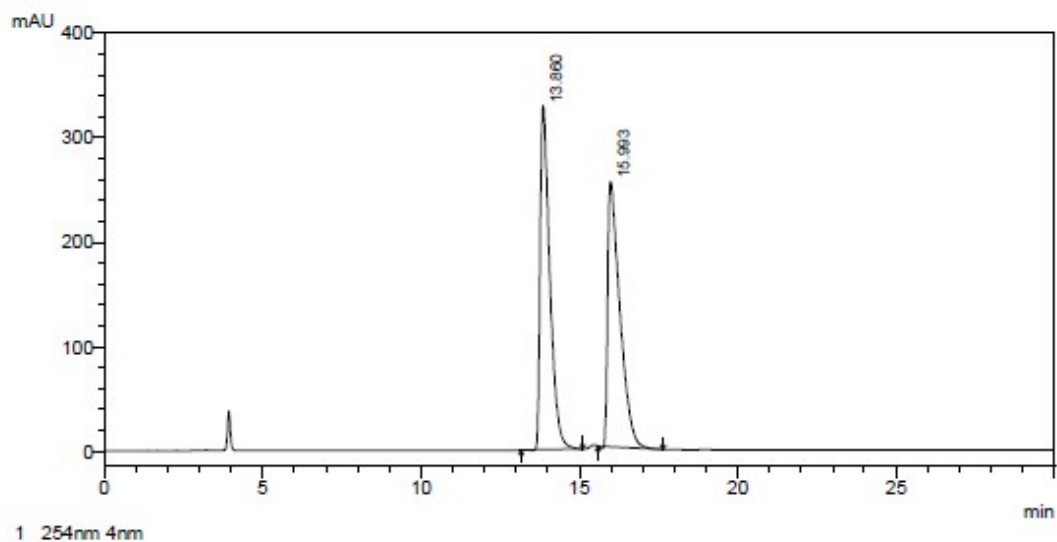

| PDA |          |         |        |        |
|-----|----------|---------|--------|--------|
| ID# | Rt. Time | Area    | Height | Area % |
| 1   | 13.860   | 6953183 | 329115 | 50.620 |
| 2   | 15.993   | 6782923 | 253871 | 49.380 |

HPLC spectra for (*R*)-1b

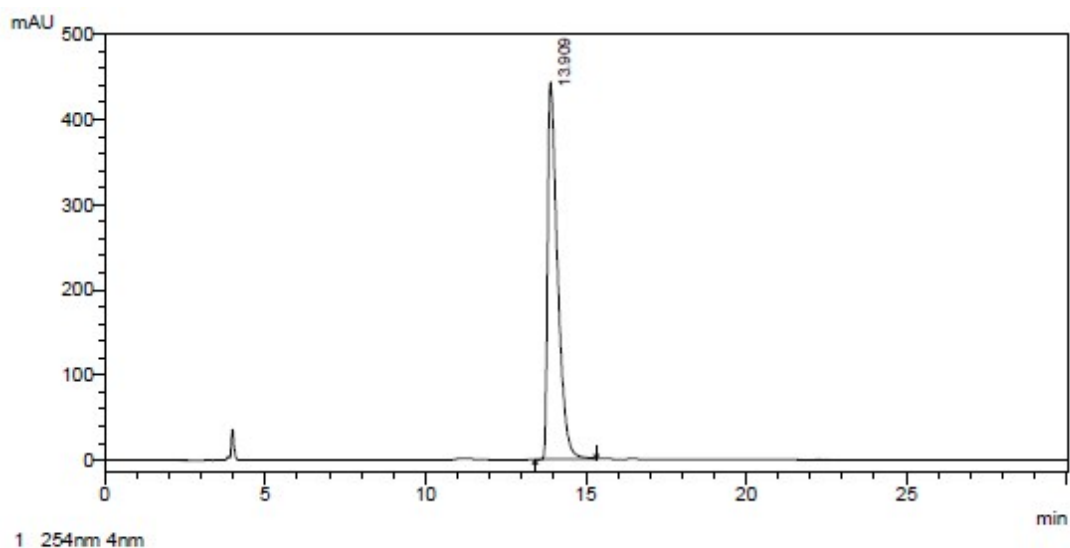

| PDA |          |         |        |         |
|-----|----------|---------|--------|---------|
| ID# | Rt. Time | Area    | Height | Area %  |
| 1   | 13.909   | 9524815 | 443114 | 100.000 |

# NMR spectra for (R)-1b

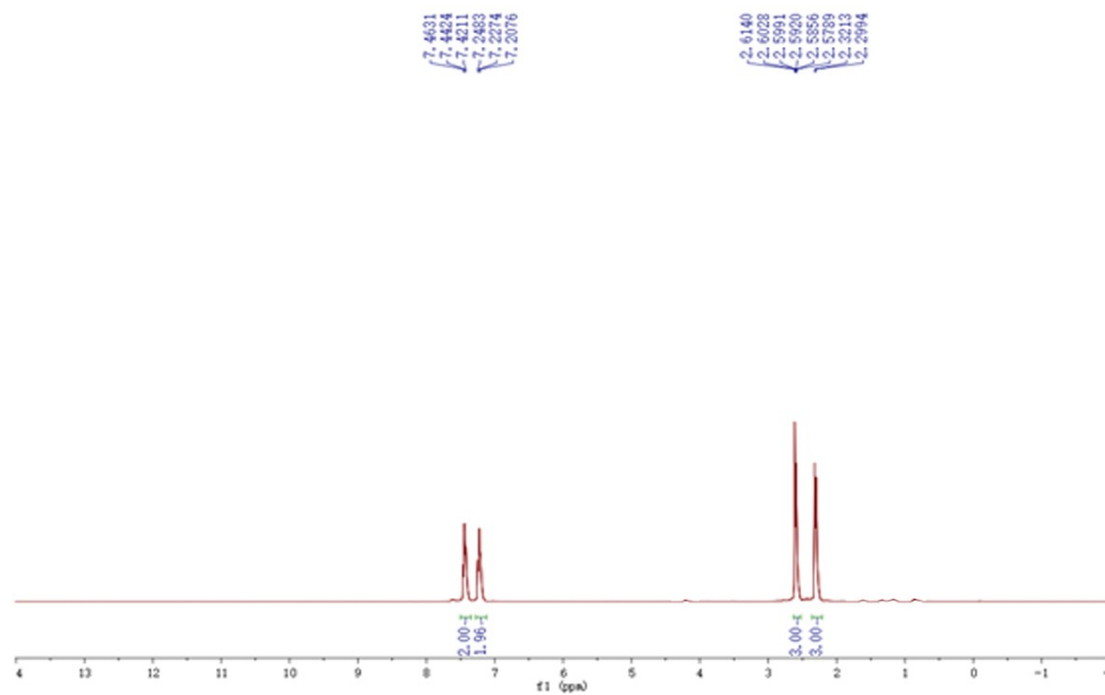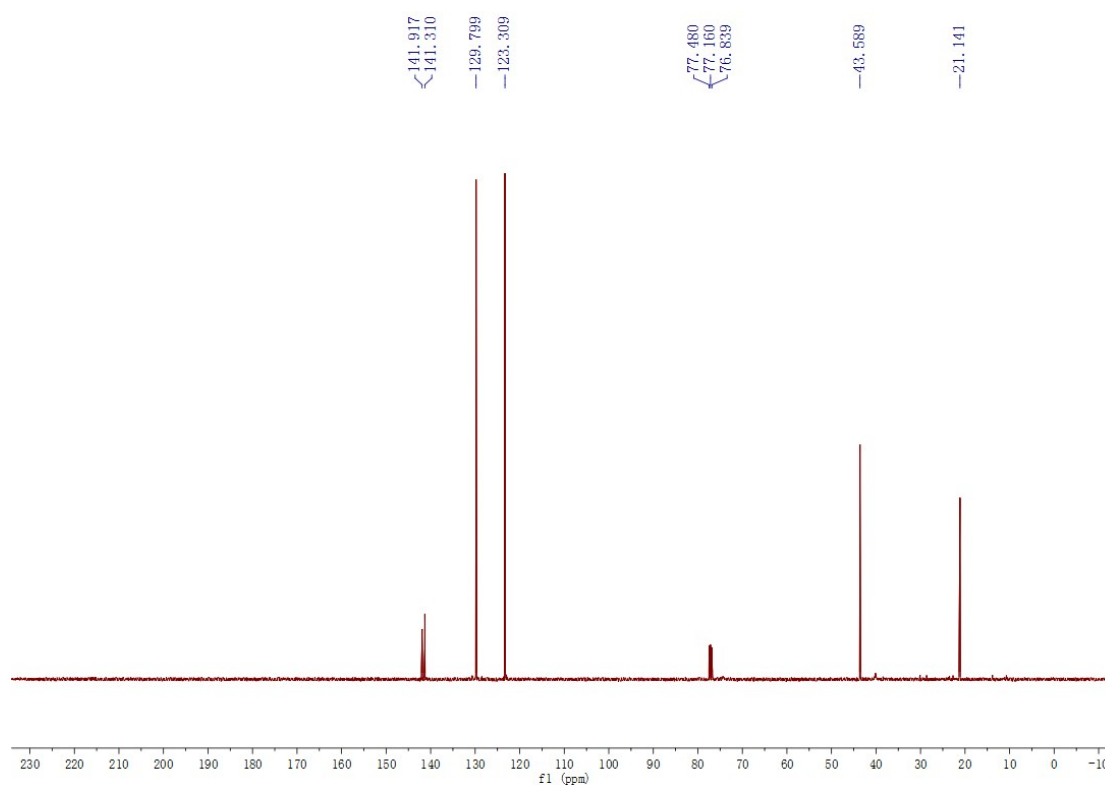

#### 4. HPLC and NMR spectra data for compound (*R*)-1c

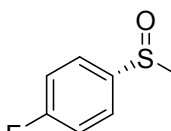

HPLC spectra for *rac*-1c

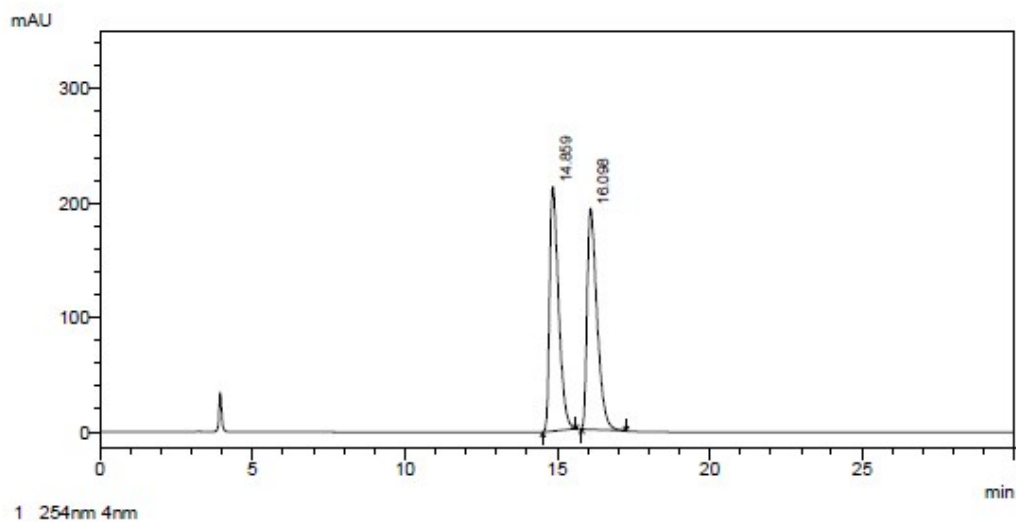

| PDA |          |         |        |        |
|-----|----------|---------|--------|--------|
| ID# | Rt. Time | Area    | Height | Area % |
| 1   | 14.859   | 4361548 | 214229 | 49.917 |
| 2   | 16.098   | 4375993 | 193483 | 50.083 |

HPLC spectra for (*R*)-1c

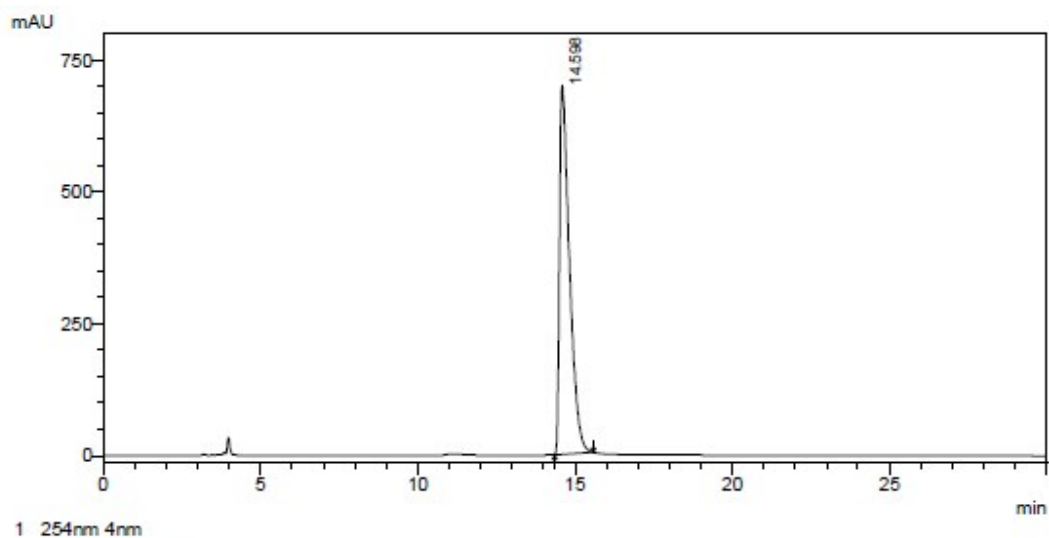

| PDA |          |          |        |         |
|-----|----------|----------|--------|---------|
| ID# | Rt. Time | Area     | Height | Area %  |
| 1   | 14.598   | 15454315 | 699972 | 100.000 |

# NMR spectra for (R)-1c

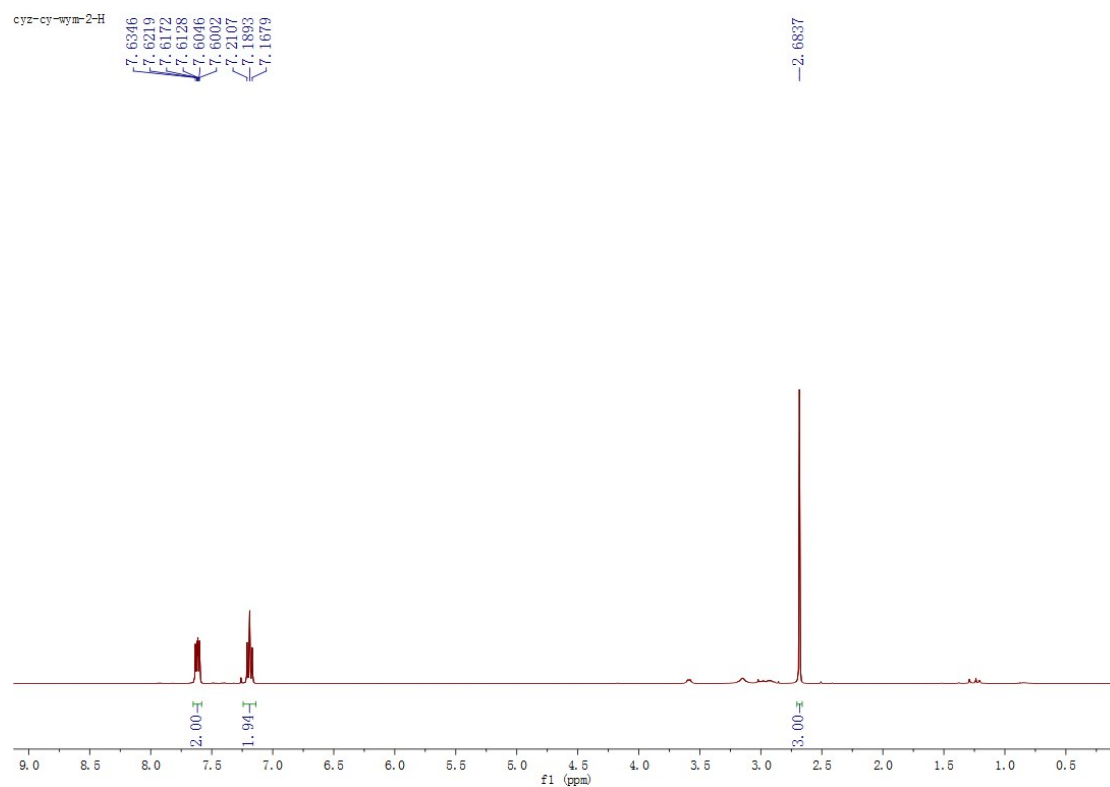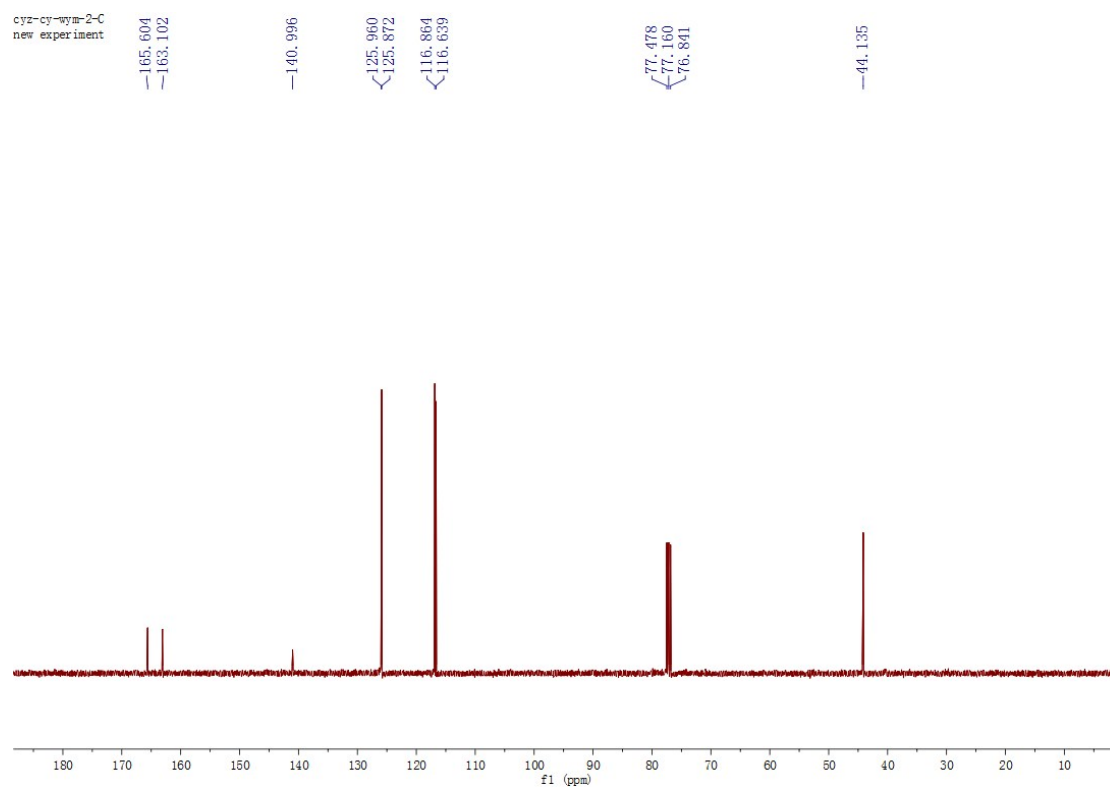



# 5. HPLC and NMR spectra for compound (*R*)-1d

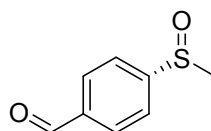

HPLC spectra for *rac*-1d

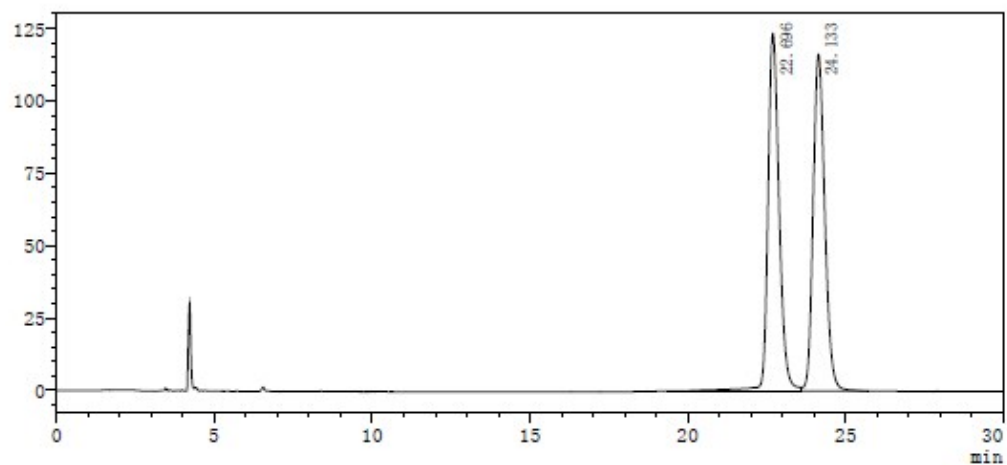

| ID# | Rt. Time | Area    | Height | Area % |
|-----|----------|---------|--------|--------|
| 1   | 22.696   | 3051392 | 123375 | 50.934 |
| 2   | 24.133   | 2939440 | 116052 | 49.066 |

HPLC spectra for (*R*)-1d

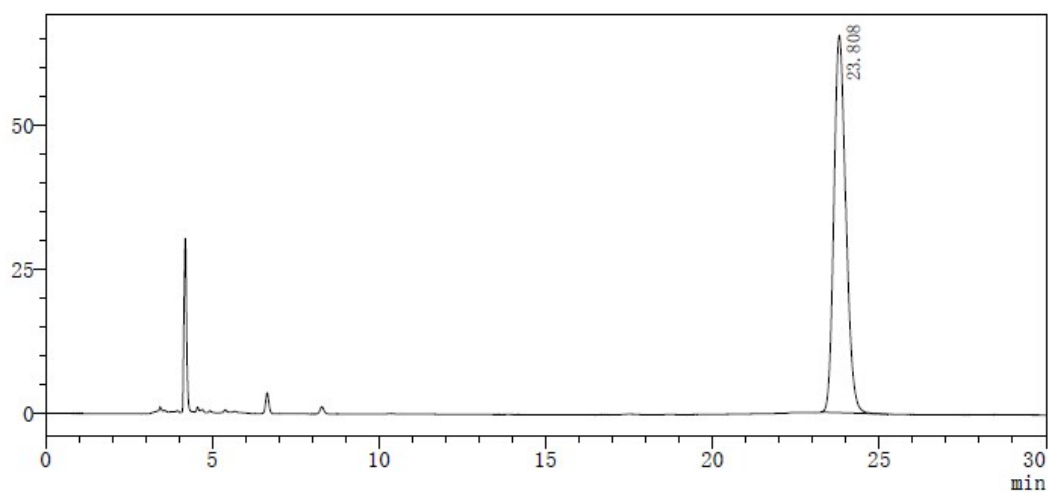

| ID# | Rt. Time | Area    | Height | Area %  |
|-----|----------|---------|--------|---------|
| 1   | 23.808   | 1619568 | 65492  | 100.000 |

# NMR spectra for (R)-1d

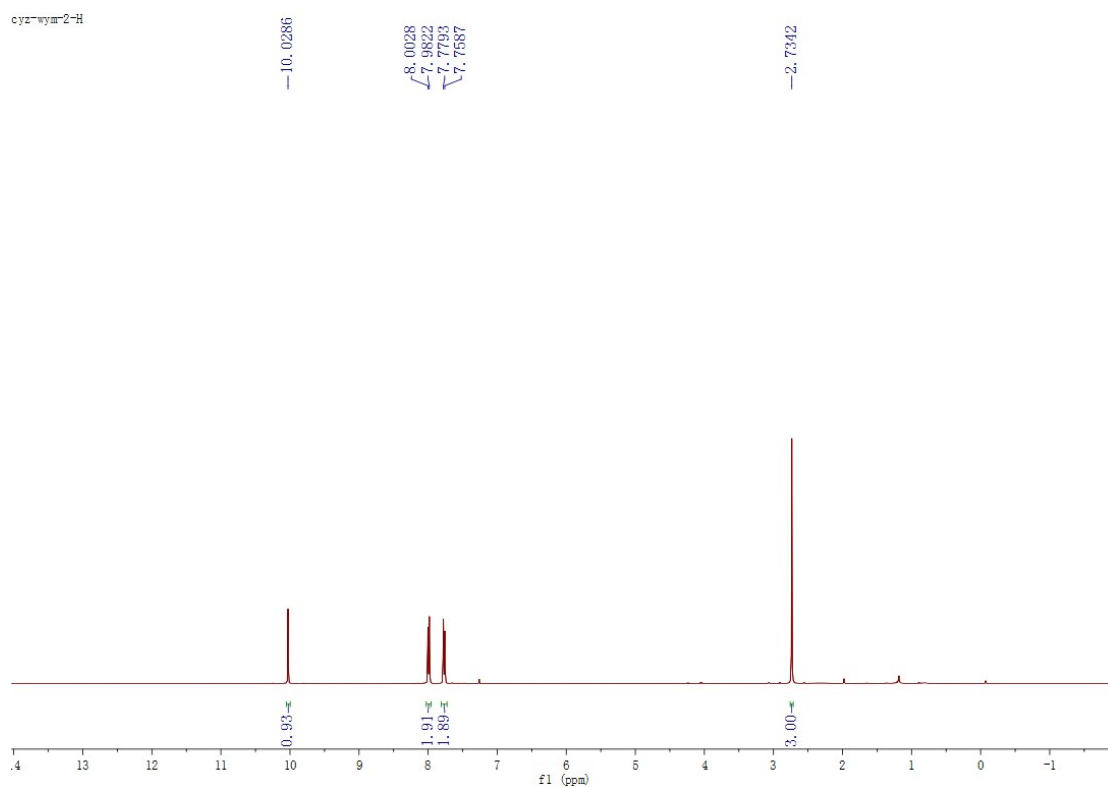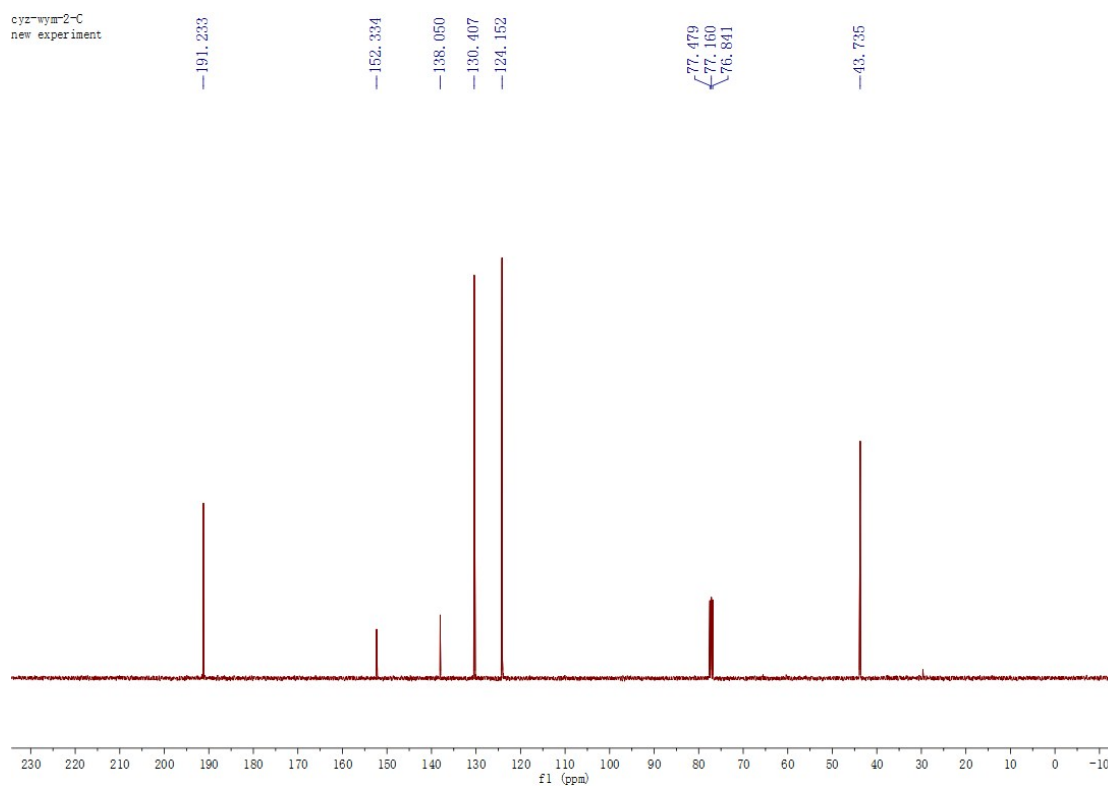

## 6. HPLC and NMR spectra data for compound (*R*)-1e

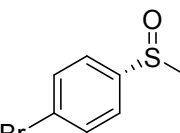

HPLC spectra for *rac*-1e

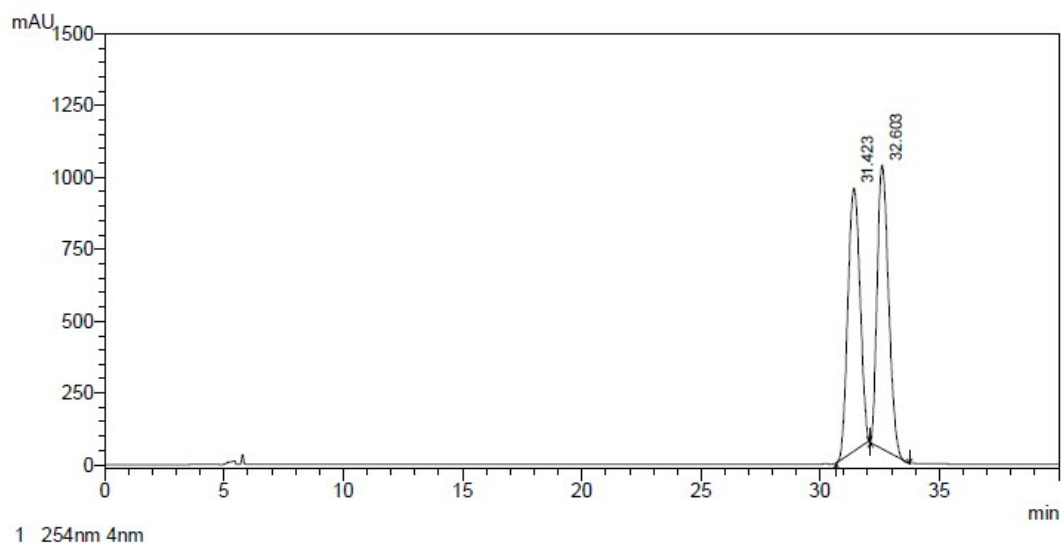

PDA

| ID# | Rt. Time | Area     | Height | Area % |
|-----|----------|----------|--------|--------|
| 1   | 31.423   | 32356330 | 915344 | 49.747 |
| 2   | 32.603   | 32684961 | 987848 | 50.253 |

HPLC spectra for (*R*)-1e

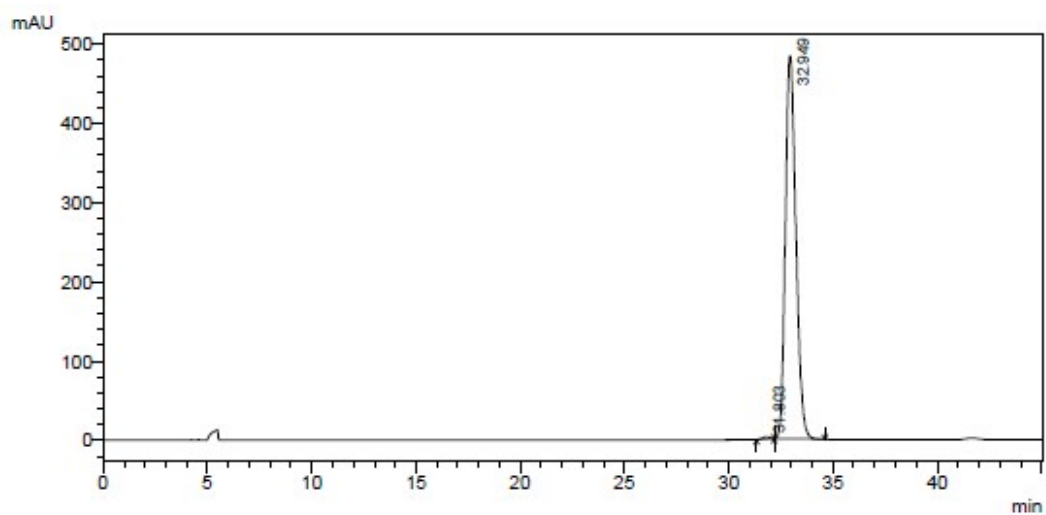

PDA

| ID# | Rt. Time | Area     | Height | Area % |
|-----|----------|----------|--------|--------|
| 1   | 31.803   | 60516    | 2403   | 0.356  |
| 2   | 32.949   | 16925585 | 483281 | 99.644 |

# NMR spectra for (R)-1e

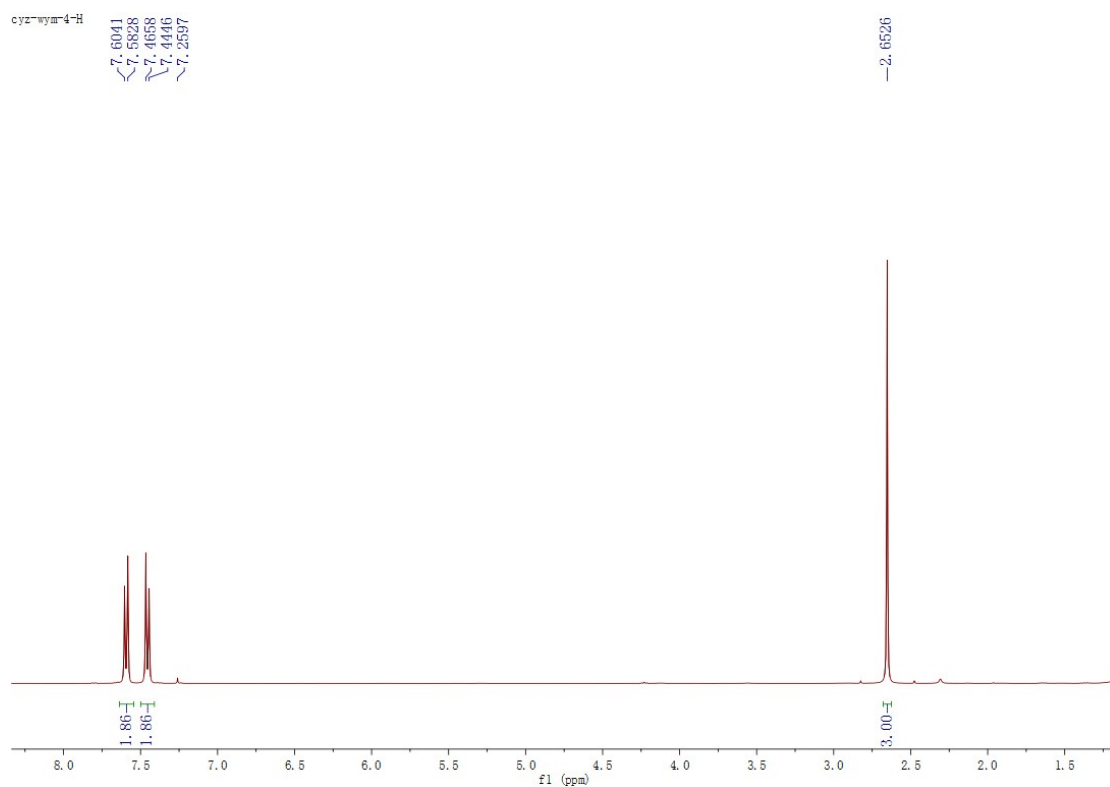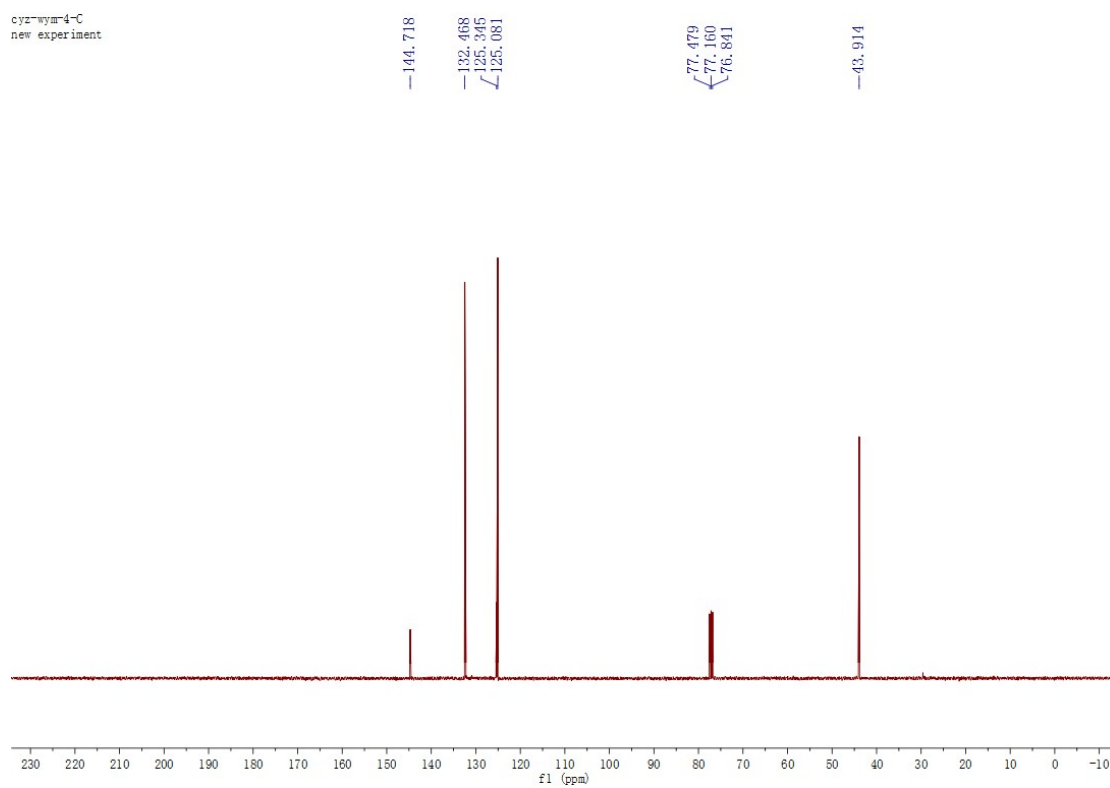

## 7. HPLC and NMR spectra data for compound (*R*)-1f

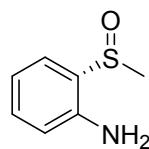

HPLC spectra for *rac*-1f

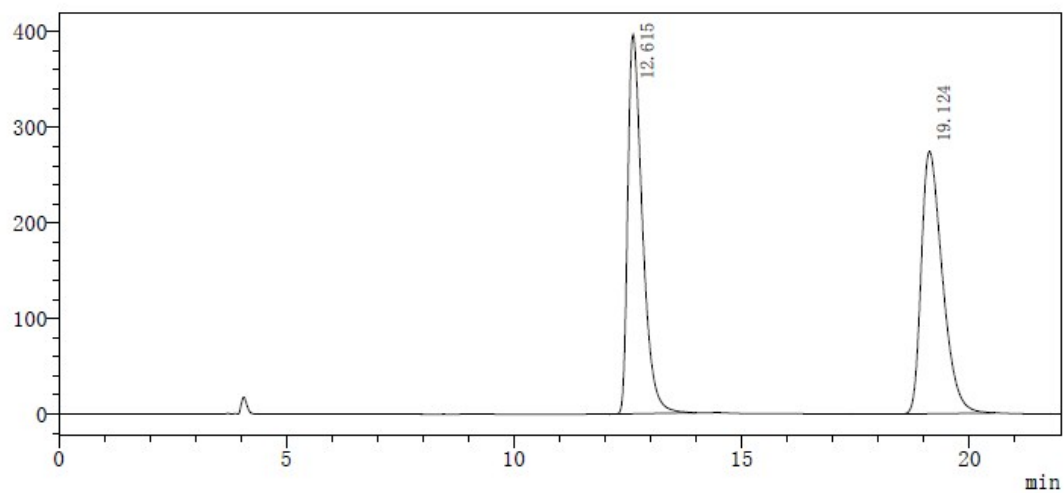

| ID# | Rt. Time | Area    | Height | Area % |
|-----|----------|---------|--------|--------|
| 1   | 12.615   | 8858510 | 397039 | 49.999 |
| 2   | 19.124   | 8858778 | 274547 | 50.001 |

HPLC spectra for (*R*)-1f

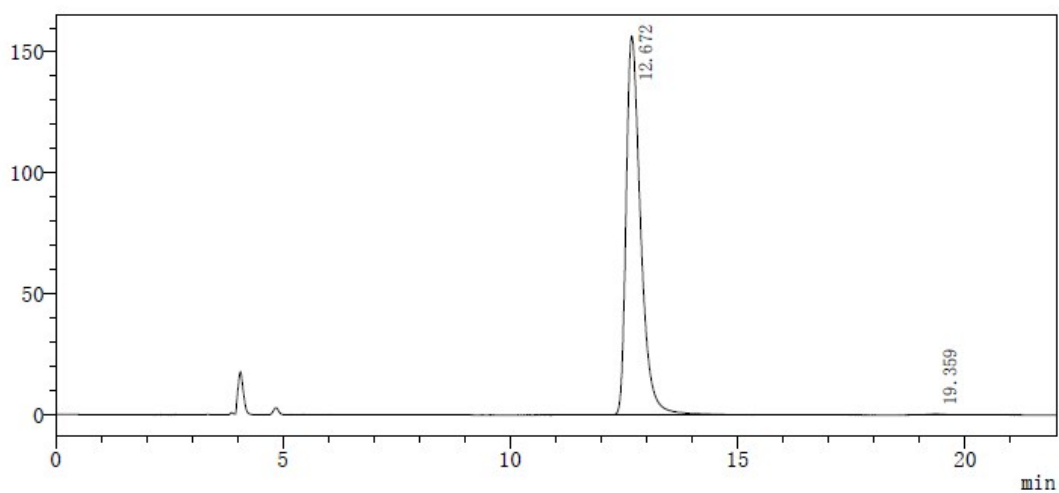

| ID# | Rt. Time | Area    | Height | Area % |
|-----|----------|---------|--------|--------|
| 1   | 12.672   | 3476163 | 156819 | 99.700 |
| 2   | 19.359   | 10458   | 334    | 0.300  |

# NMR spectra for (*R*)-1f

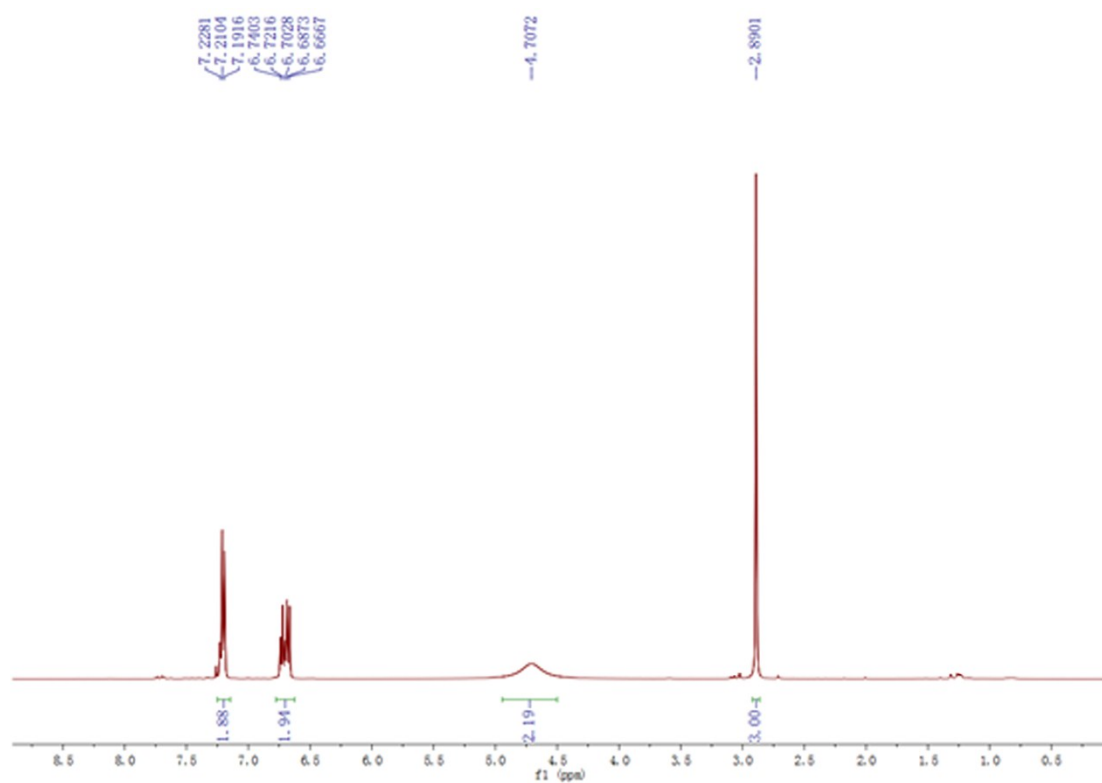

cys-cy-coym-3-C  
new experiment

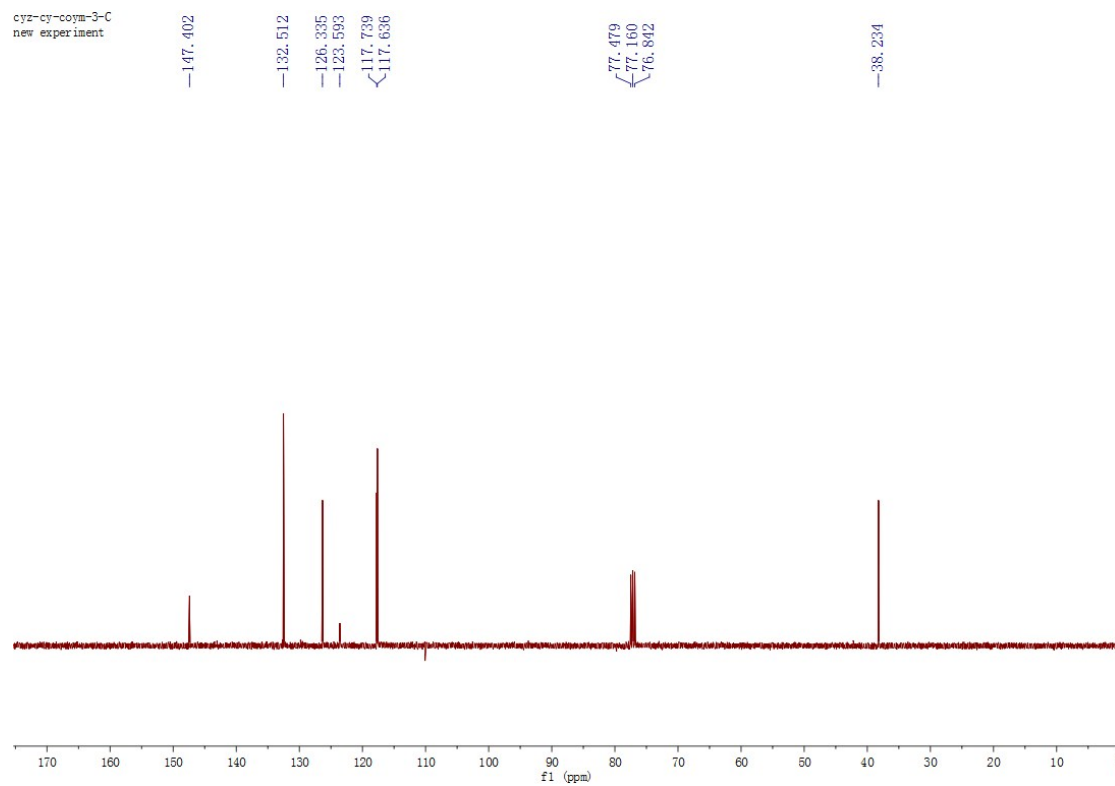

# 8. GC and NMR spectra for data compound (*R*)-1g

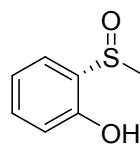

GC spectra for *rac*-1g

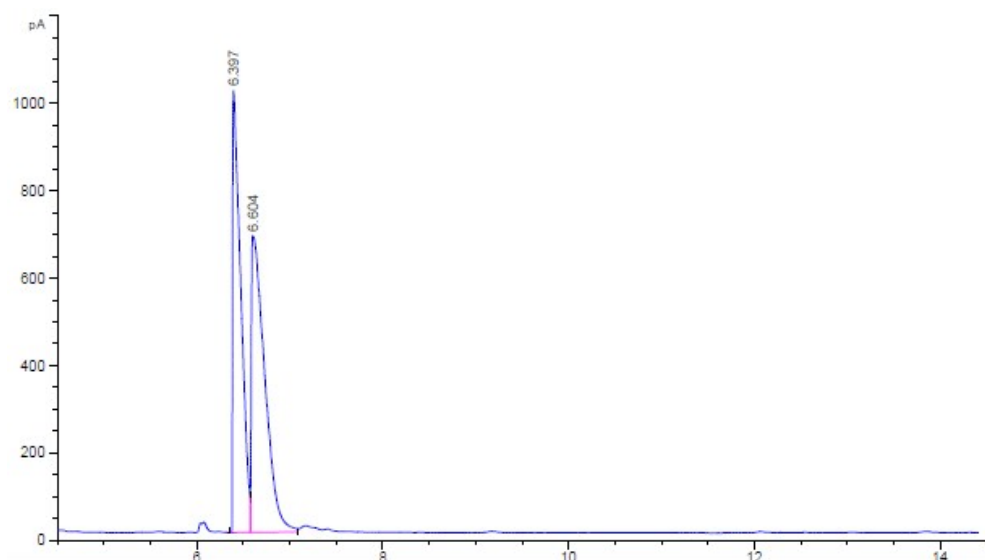

| 峰 # | 保留时间 [min] | 类型 | 峰宽 [min] | 峰面积 [pA*s] | 峰高 [pA]    | 峰面积 %    |
|-----|------------|----|----------|------------|------------|----------|
| 1   | 6.397      | BV | 0.0794   | 6117.68799 | 1011.41205 | 47.37368 |
| 2   | 6.604      | VB | 0.1225   | 6795.99805 | 677.99457  | 52.62632 |

GC spectra for (*R*)-1g

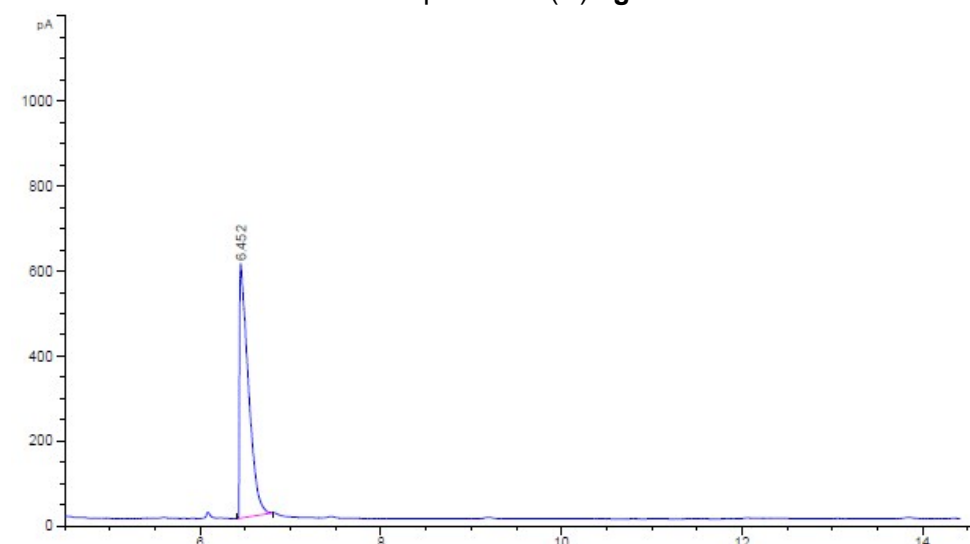

| 峰 # | 保留时间 [min] | 类型 | 峰宽 [min] | 峰面积 [pA*s] | 峰高 [pA]   | 峰面积 %   |
|-----|------------|----|----------|------------|-----------|---------|
| 1   | 6.452      | BB | 0.0875   | 4052.55835 | 594.98383 | 1.000e2 |

# NMR spectra for (R)-1g

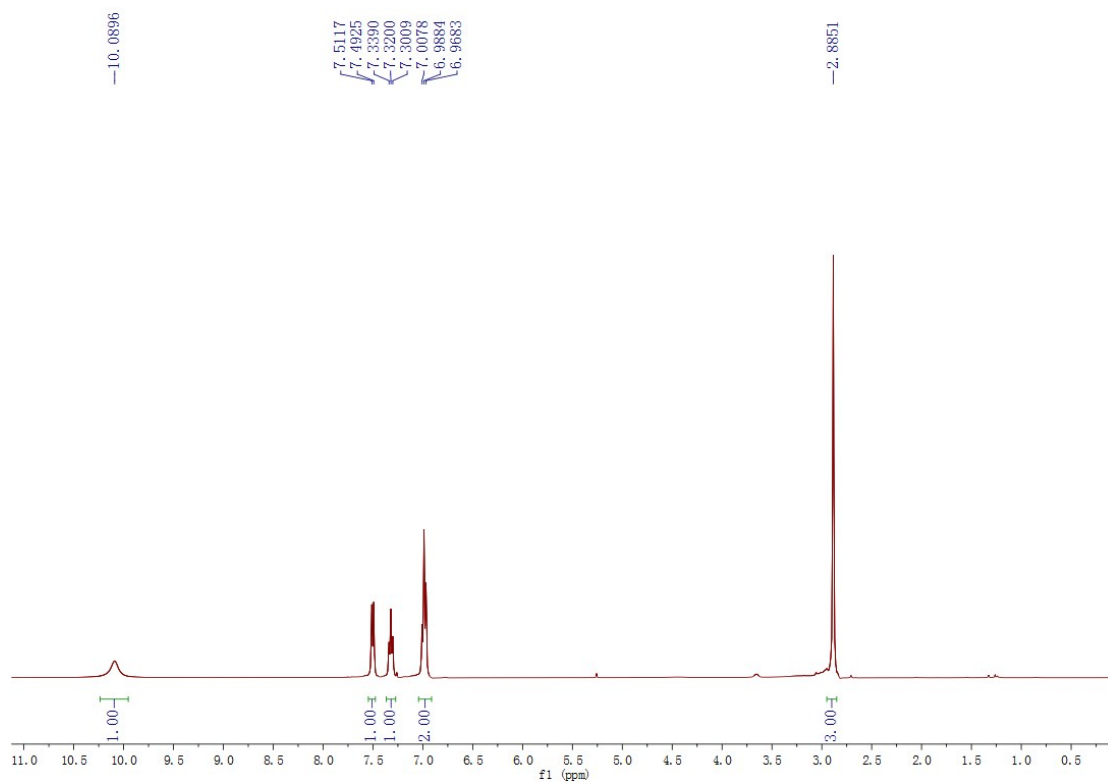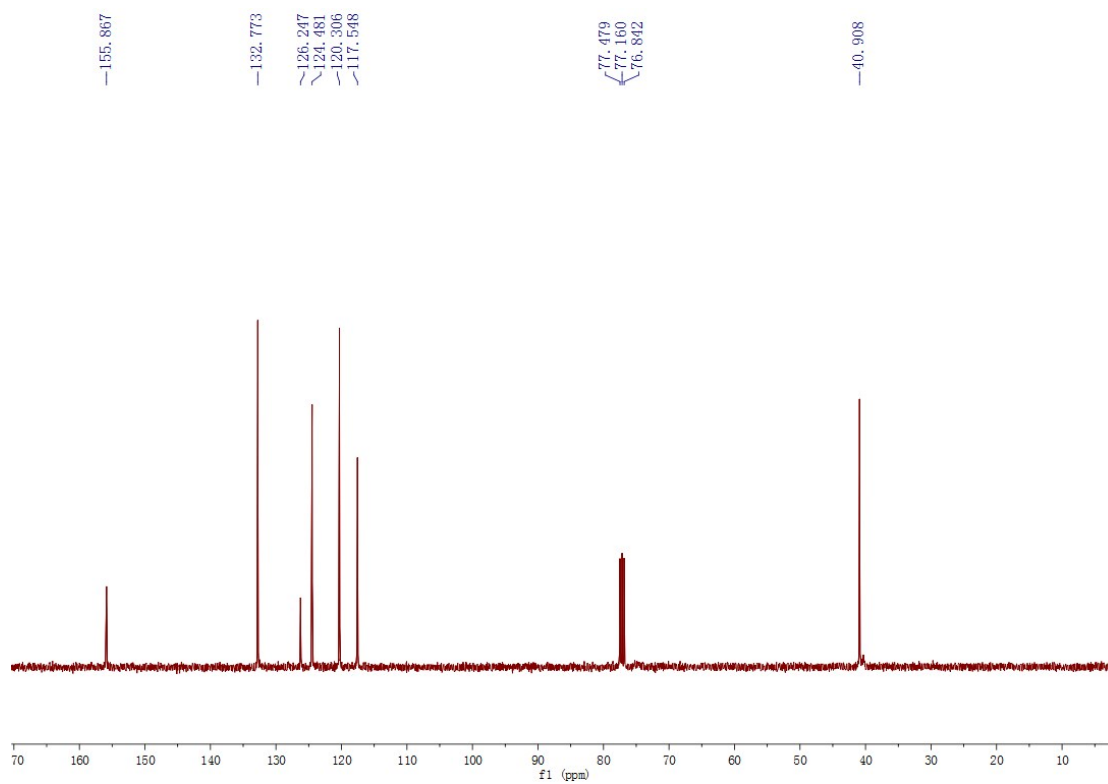



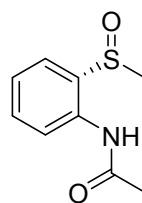

## 9. HPLC and NMR spectra data for compound (R)-1h

GC spectra for *rac*-1h

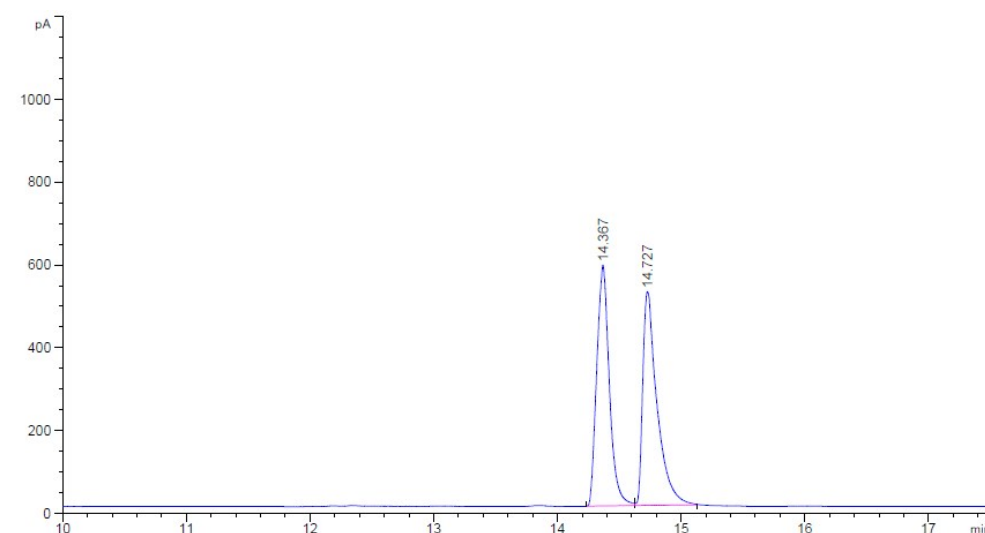

| 峰 # | 保留时间 [min] | 类型 | 峰宽 [min] | 峰面积 [pA*s] | 峰高 [pA]   | 峰面积 %    |
|-----|------------|----|----------|------------|-----------|----------|
| 1   | 14.367     | BV | 0.0952   | 4109.05664 | 581.48865 | 49.85535 |
| 2   | 14.727     | VB | 0.1118   | 4132.89990 | 515.97479 | 50.14465 |

GC spectra for (R)-1h

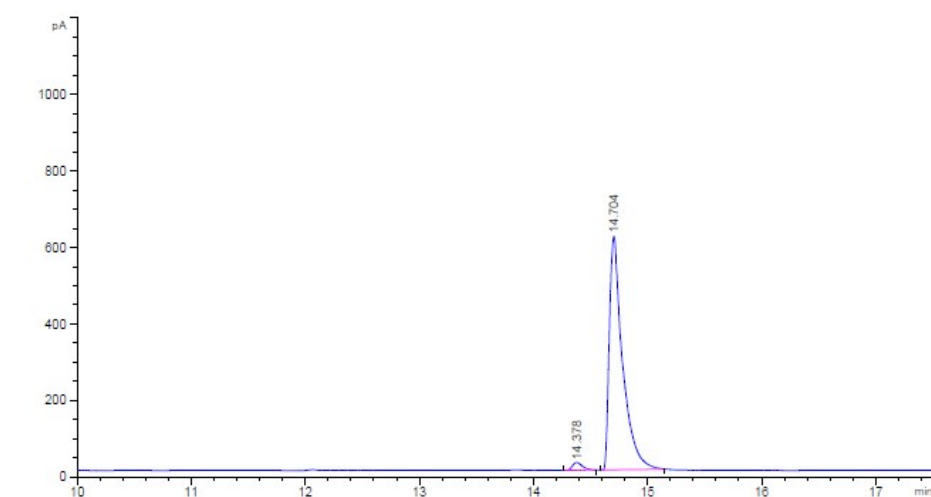

| 峰 # | 保留时间 [min] | 类型 | 峰宽 [min] | 峰面积 [pA*s] | 峰高 [pA]   | 峰面积 %    |
|-----|------------|----|----------|------------|-----------|----------|
| 1   | 14.378     | BB | 0.0941   | 124.46075  | 20.25585  | 2.46937  |
| 2   | 14.704     | BB | 0.1148   | 4915.72461 | 609.83362 | 97.53063 |

# NMR spectra for (*R*)-1h

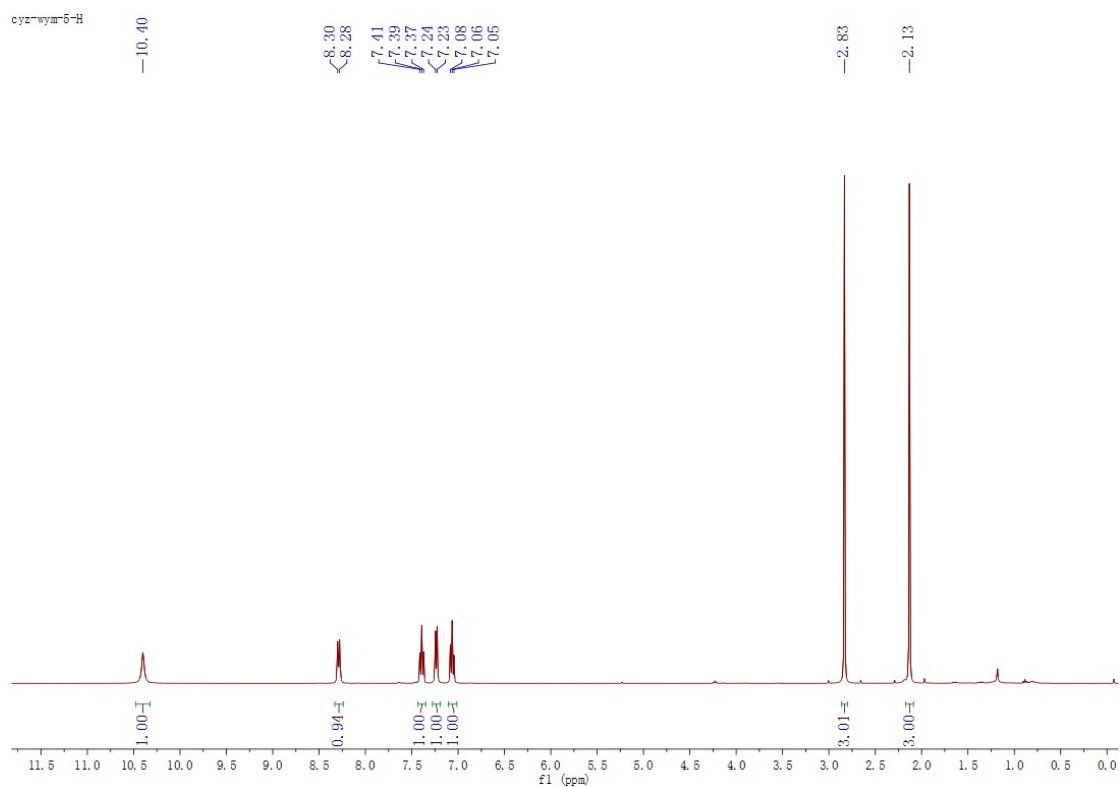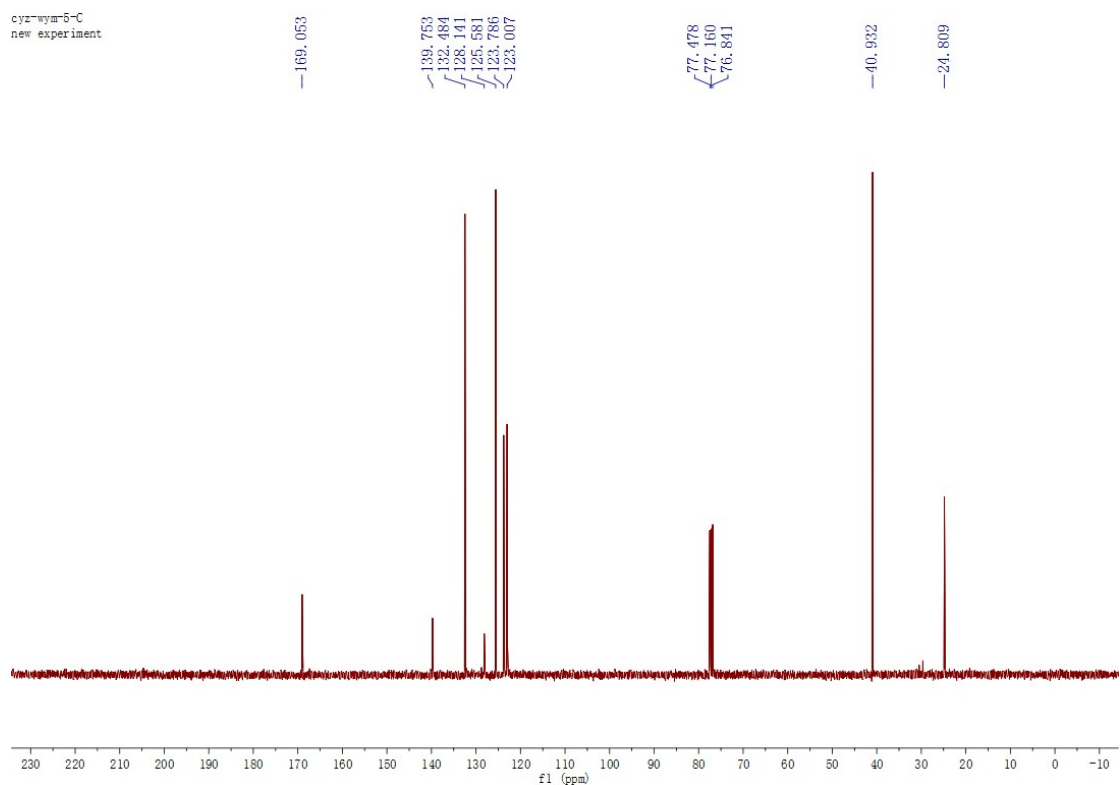

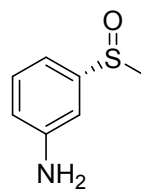

10. HPLC and NMR spectra for compound (*R*)-1i

HPLC spectra for *rac*-1i

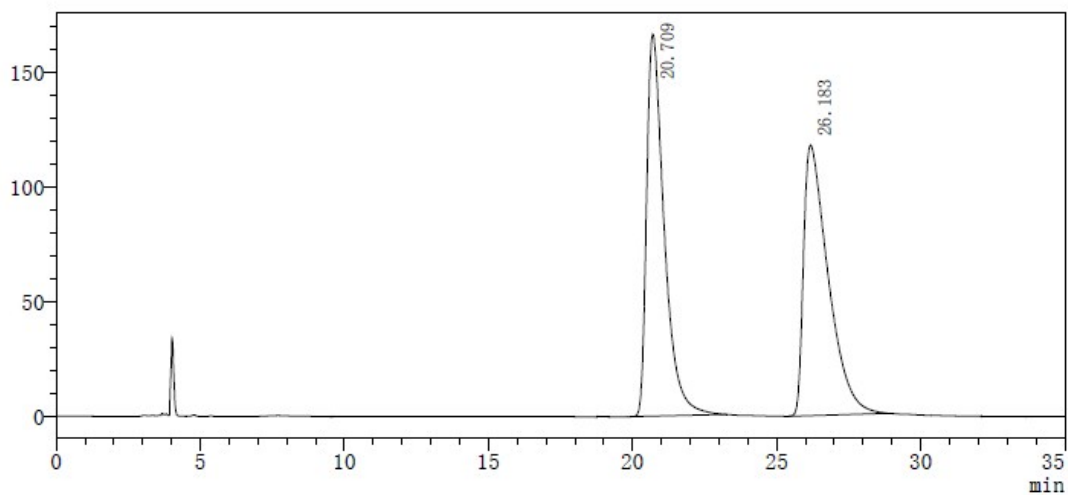

| ID# | Rt. Time | Area    | Height | Area % |
|-----|----------|---------|--------|--------|
| 1   | 20.709   | 7065833 | 166493 | 50.225 |
| 2   | 26.183   | 7002586 | 117773 | 49.775 |

HPLC spectra for (*R*)-1i

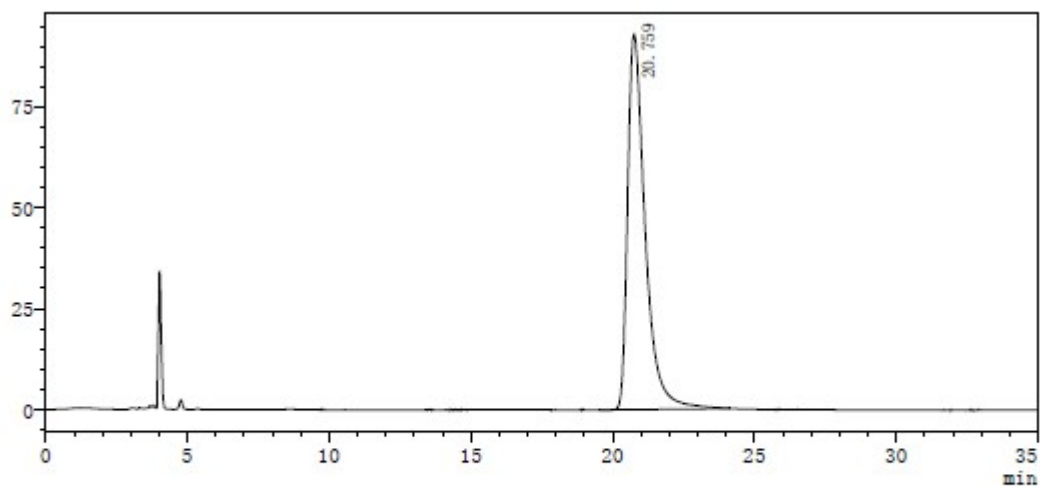

| ID# | Rt. Time | Area    | Height | Area %  |
|-----|----------|---------|--------|---------|
| 1   | 20.759   | 4001483 | 93011  | 100.000 |

# NMR spectra for (R)-1i

cyz-cywyms-H

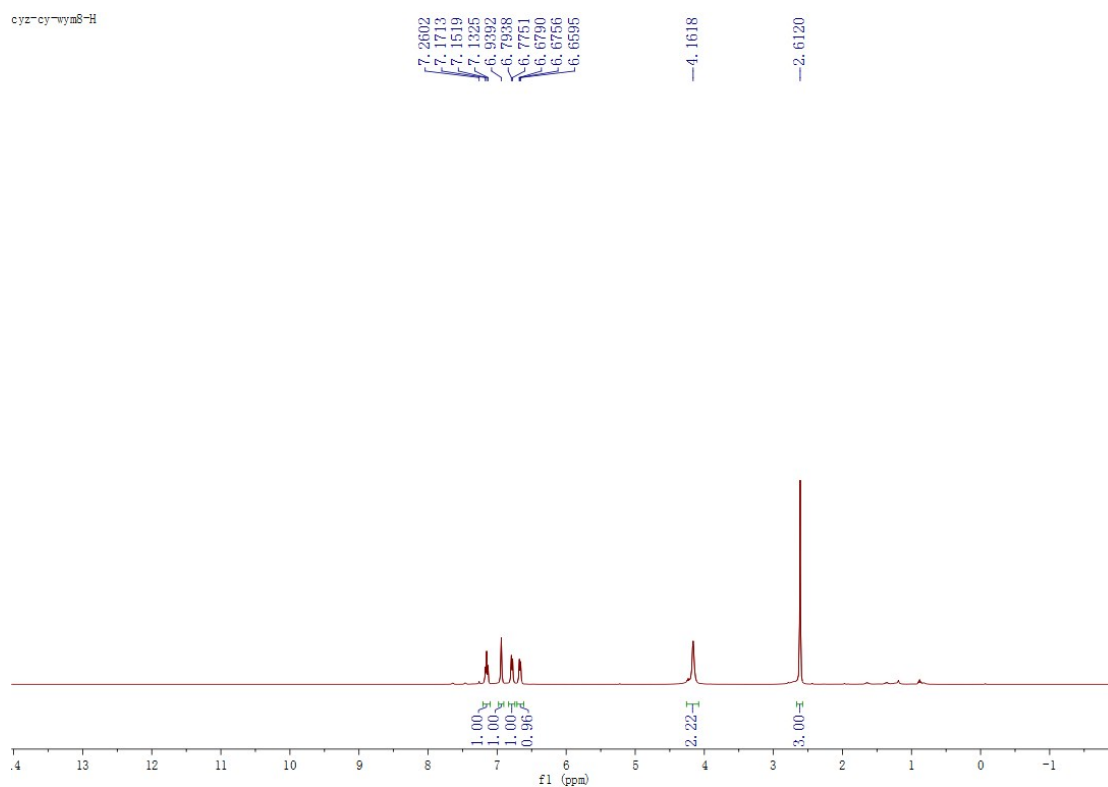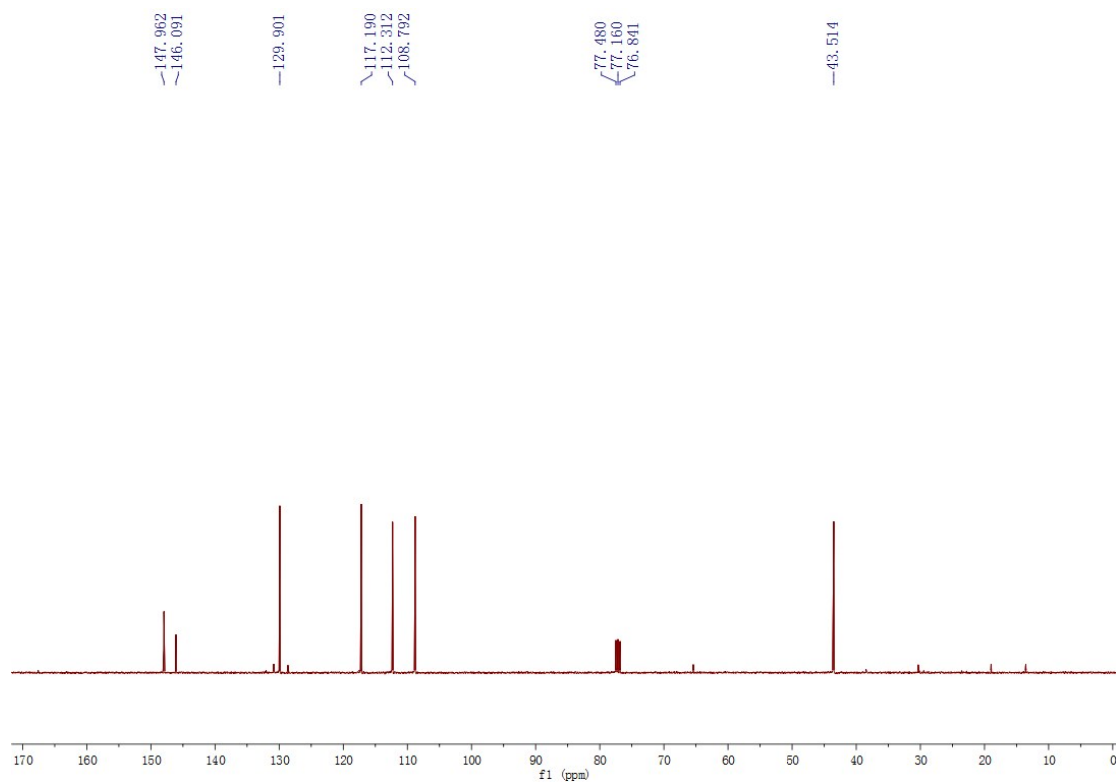

# 11. HPLC and NMR spectra data for compound (R)-1j

## HPLC spectra for rac-1j

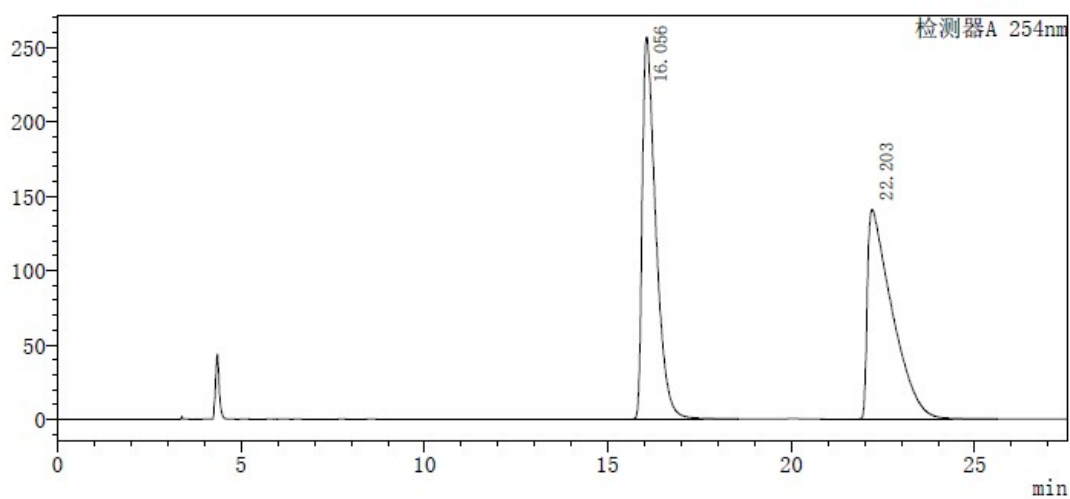

检测器A 254nm

| ID# | Rt. Time | Area    | Height | Area % |
|-----|----------|---------|--------|--------|
| 1   | 16.056   | 6612219 | 257124 | 49.934 |
| 2   | 22.203   | 6629649 | 140886 | 50.066 |

## HPLC spectra for (R)-1j

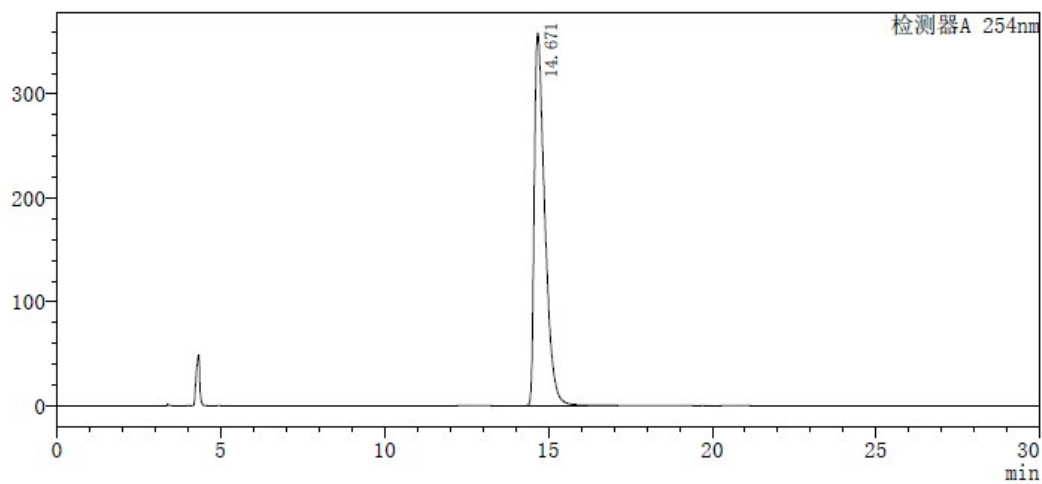

检测器A 254nm

| ID# | Rt. Time | Area    | Height | Area %  |
|-----|----------|---------|--------|---------|
| 1   | 14.671   | 8071650 | 358401 | 100.000 |

NMR spectra for (R)-1j

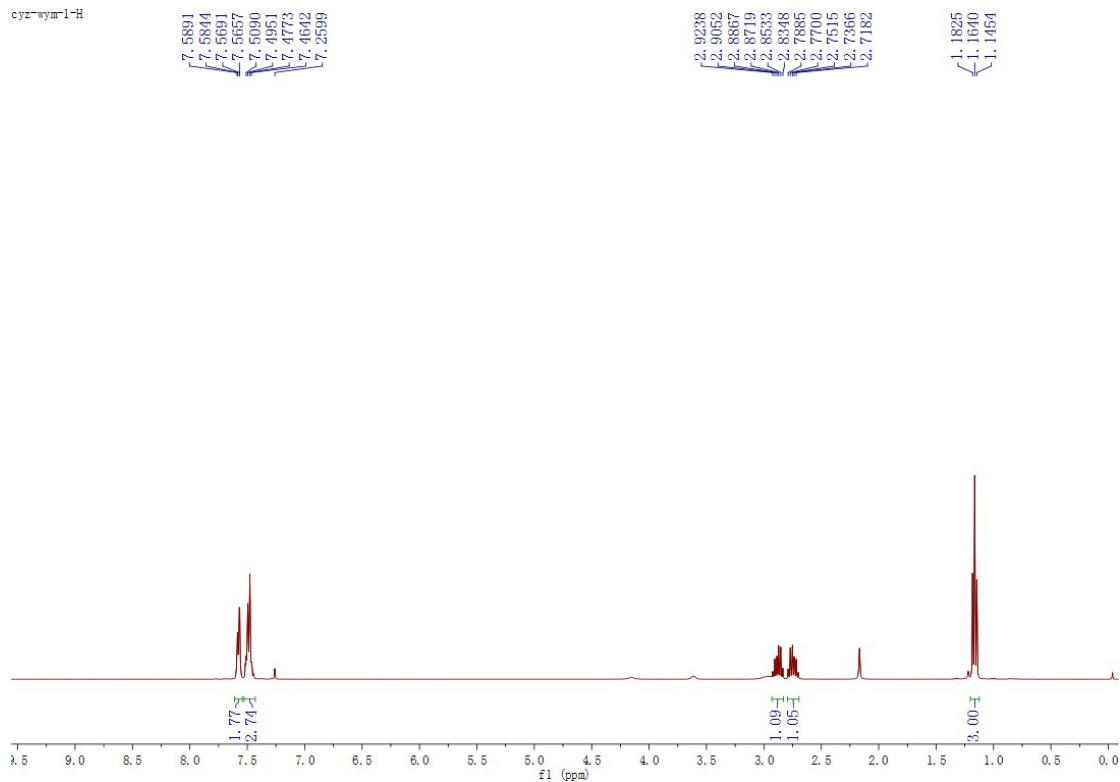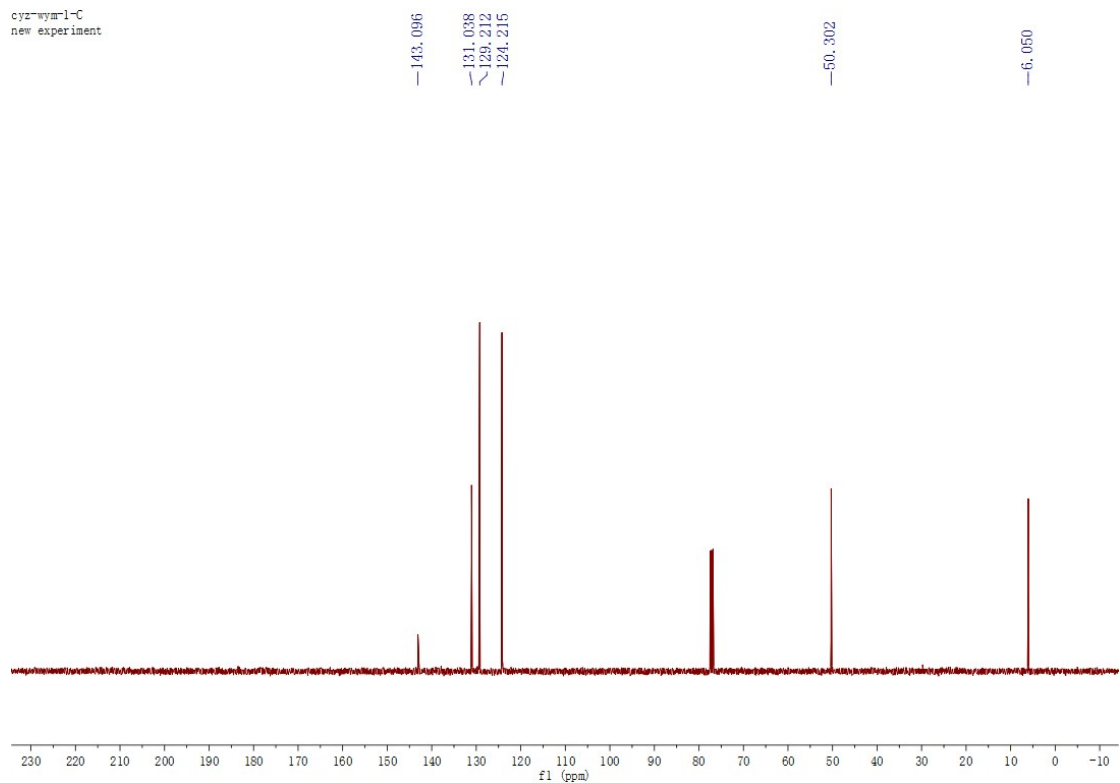

## 12. HPLC and NMR spectra data for compound (R)-1k

HPLC spectra for *rac*-1k

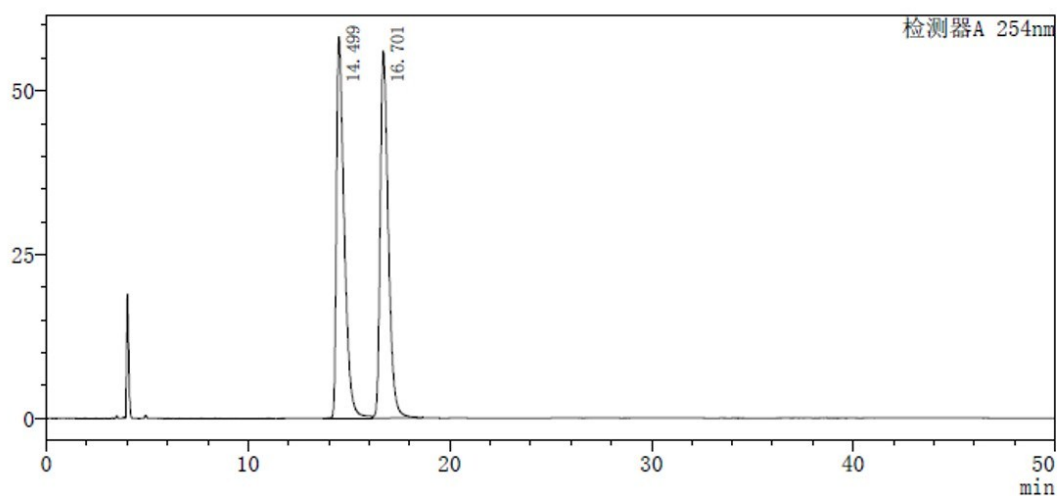

| 检测器A 254nm |          |         |        |        |
|------------|----------|---------|--------|--------|
| ID#        | Rt. Time | Area    | Height | Area % |
| 1          | 14.499   | 1563108 | 58179  | 49.920 |
| 2          | 16.701   | 1568094 | 55981  | 50.080 |

HPLC spectra for (R)-1k

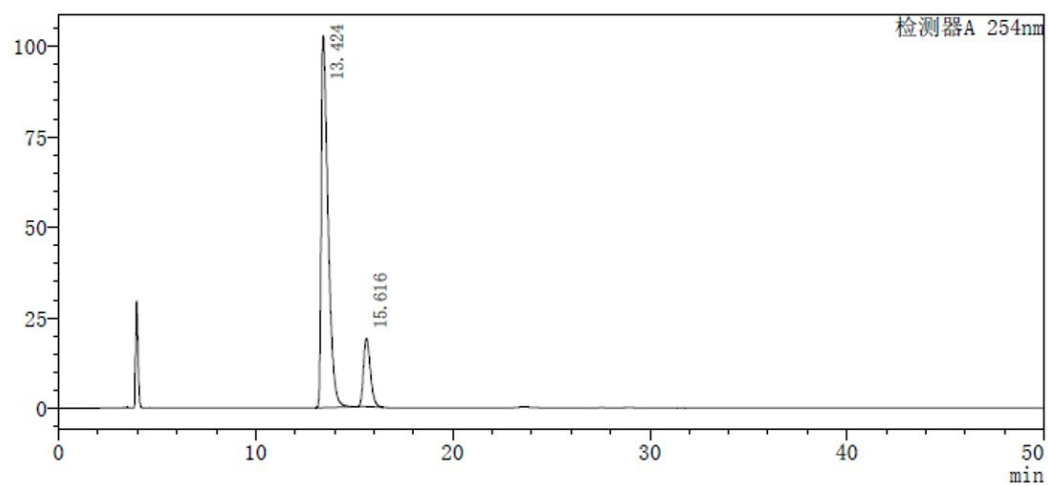

| 检测器A 254nm |          |         |        |        |
|------------|----------|---------|--------|--------|
| ID#        | Rt. Time | Area    | Height | Area % |
| 1          | 13.424   | 2492019 | 102808 | 84.559 |
| 2          | 15.616   | 455060  | 18895  | 15.441 |

# NMR spectra for (R)-1k

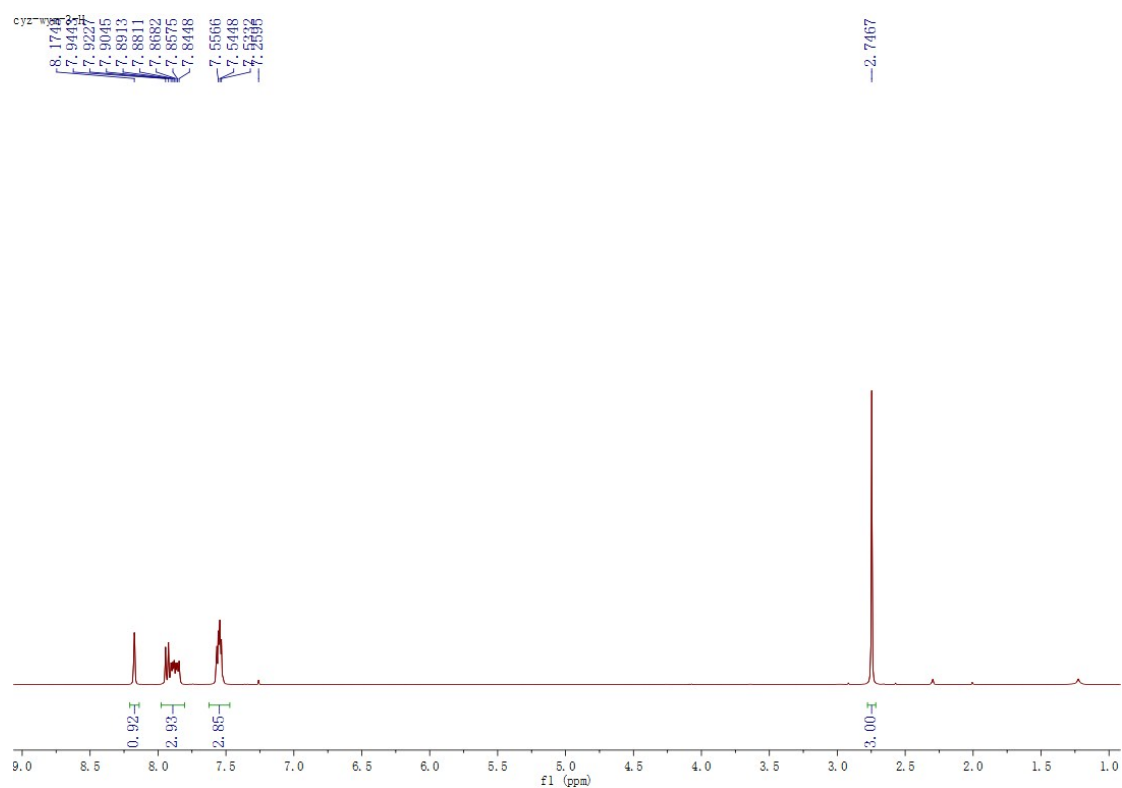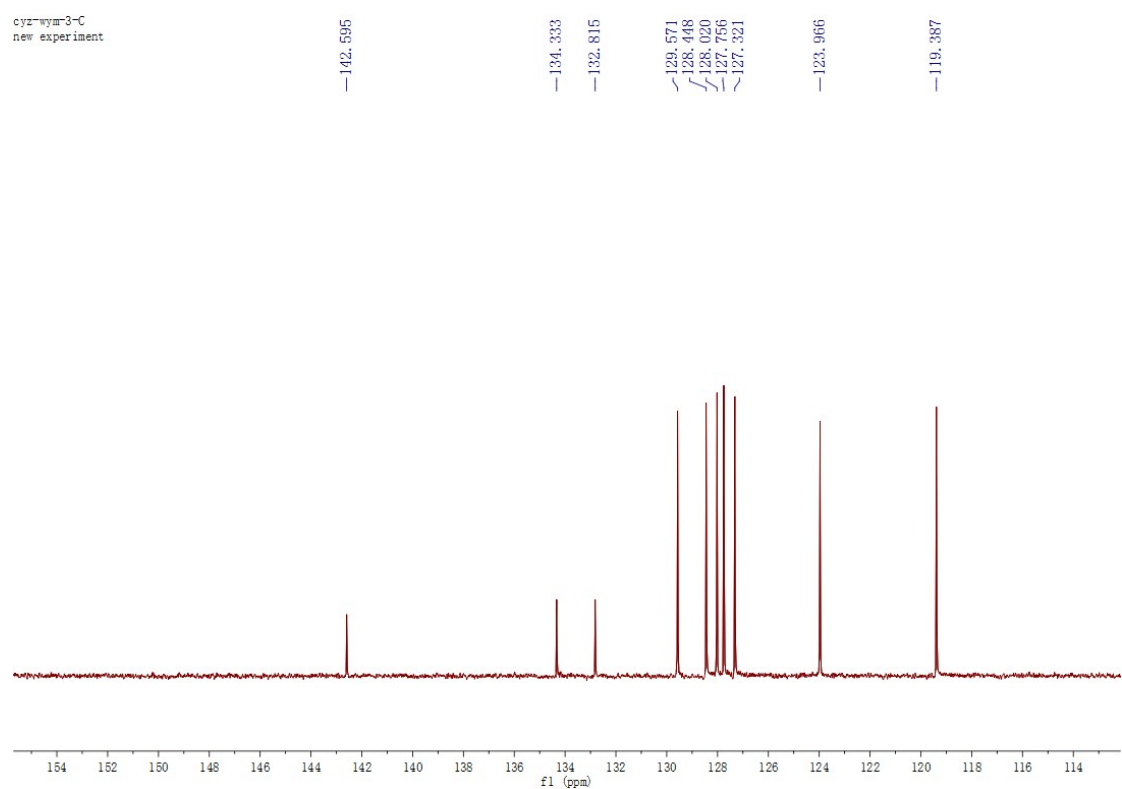

Supplement: c9ob00384c1.pdf [file c9ob00384c1.pdf]
